1 **Characterization of highly ferulate-tolerant *Acinetobacter baylyi* ADP1 isolates**  
2 **by a rapid reverse-engineering method**

3 Jin Luo<sup>1#</sup>, Emily A. McIntyre<sup>2</sup>, Stacy R. Bedore<sup>2</sup>, Ville Santala<sup>1</sup>, Ellen L. Neidle<sup>2</sup>, Suvi Santala<sup>1</sup>

4 <sup>1</sup>Faculty of Engineering and Natural Sciences, Hervanta campus, Tampere University,

5 Korkeakoulunkatu 8, Tampere, 33720, Finland

6 <sup>2</sup>Department of Microbiology, University of Georgia, Athens, GA 30602-2605 USA

7 Running head: Characterization of ferulate-tolerant isolates

8 Keywords: adaptive laboratory evolution; aromatic acids; tolerance; reverse engineering;

9 *Acinetobacter baylyi* ADP1

10 #Address correspondence to Jin Luo: [jin.luo@tuni.fi](mailto:jin.luo@tuni.fi)

11 Emily A. McIntyre: [emcintyre@uga.edu](mailto:emcintyre@uga.edu)

12 Stacy R. Bedore: [stacybedore@uga.edu](mailto:stacybedore@uga.edu)

13 Ville Santala: [ville.santala@tuni.fi](mailto:ville.santala@tuni.fi)

14 Ellen L. Neidle: [eneidle@uga.edu](mailto:eneidle@uga.edu)

15 Suvi Santala: [suvi.santala@tuni.fi](mailto:suvi.santala@tuni.fi)

## 16 **Abstract**

17 Adaptive laboratory evolution (ALE) is a powerful approach for improving phenotypes of  
18 microbial hosts. Evolved strains typically contain numerous mutations that can be revealed by  
19 whole-genome sequencing. However, determining the contribution of specific mutations to new  
20 phenotypes is typically challenging and laborious. This task is complicated by factors such as the  
21 mutation type, the genomic context, and the interplay between different mutations. Here, a novel  
22 approach was developed to identify the significance of mutations in strains derived from  
23 *Acinetobacter baylyi* ADP1. This method, termed Rapid Advantageous Mutation ScrEening and  
24 Selection (RAMSES), was used to analyze mutants that emerged from stepwise adaptation to, and  
25 consumption of, high levels of ferulate, a common lignin-derived aromatic compound. After  
26 whole-genome sequence analysis, RAMSES allowed both rapid determination of effective  
27 mutations and seamless introduction of the beneficial mutations into the chromosomes of new  
28 strains with different genetic backgrounds. This simple approach to reverse-engineering exploits  
29 the natural competence and high recombination efficiency of ADP1. The growth advantage of  
30 transformants under selective pressure revealed key mutations in genes related to aromatic  
31 transport, including *hcaE*, *hcaK*, and *vanK*, and a gene, *ACIAD0482*, which is associated with  
32 lipopolysaccharide synthesis. This study provides insights into enhanced utilization of industrially  
33 relevant aromatic substrates and demonstrates the use of *A. baylyi* ADP1 as a convenient platform  
34 for strain development and evolution studies.

## 35 **Importance**

36 Microbial conversion of lignin-enriched streams is a promising approach for lignin valorization.  
37 However, the lignin-derived aromatic compounds are toxic to cells at relevant concentrations.

38 Adaptive laboratory evolution is a powerful approach to develop more tolerant strains, but  
39 revealing the underlying mechanisms behind phenotypic improvement typically involves  
40 laborious processes. We employed *Acinetobacter baylyi* ADP1, an aromatic compound degrading  
41 strain that may be useful for biotechnology. The natural competence and high recombination  
42 efficiency of strain ADP1 can be exploited for critical applications such as the breakdown of lignin  
43 and plastics, abundant polymers composed of aromatic subunits. The natural transformability of  
44 this bacterium enabled us to develop a novel approach that allows rapid screening of advantageous  
45 mutations from ALE-derived aromatic-tolerant ADP1 strains. We clarified the mechanisms and  
46 genetic targets for improved tolerance towards common lignin-derived aromatic compounds. This  
47 study facilitates metabolic engineering for lignin valorization.

## 48 **1. Introduction**

49 The importance of adaptive laboratory evolution (ALE) (1, 2) in generating strains with desired  
50 traits is evidenced by success in improving the tolerance of production hosts towards stresses  
51 caused by non-optimal pH levels (3), high substrate or product concentrations (2, 4, 5), or other  
52 growth inhibitors (6, 7). Discovery of the associated genetic change can be accomplished by  
53 whole-genome sequencing (1, 2). However, it is challenging to determine the contribution of  
54 mutations, alone or in combination, to the evolved phenotype, as ALE typically yields multiple  
55 mutations (2). In addition, mutations may occur in poorly characterized genes. Some mutations  
56 may be neutral, others important for the evolutionary trajectory but not the final phenotype, and  
57 yet others may be deleterious hitchhikers (2).

58 Statistical methods have the potential to predict relevant mutations across a large number of  
59 independent ALE experiments (8), but a more profound understanding of the functional relevance

60 of genetic change requires the reconstruction of strains with specific mutations (2). Such  
61 reconstruction, also referred to as reverse engineering, can be done by the introduction of selected  
62 mutations into reference strains, followed by comparative analyses (5, 7, 9–11). However,  
63 significant efforts may be required to synthesize alleles and integrate genetic changes in the  
64 appropriate location, especially when multiple mutations are tested. The bacterium used in our  
65 experiments, *Acinetobacter baylyi* ADP1 (hereafter ADP1), has unique advantages for  
66 determining the combinatorial effects of mutations. Its high efficiency of natural transformation  
67 and allelic replacement have long been exploited because linear DNA can be added directly to  
68 growing cultures. DNA responsible for a new phenotype is readily identified when it confers a  
69 growth advantage (12). As described here, we developed a high throughput method for the  
70 simultaneous analysis of multiple ALE-generated mutations.

71 ADP1 is an ideal model organism for biotechnology and synthetic biology (13) that has been used  
72 to study bacterial metabolism, engineering, and evolution (14–17). The potential of ADP1 as a  
73 production host for the synthesis of both native (18–22) and non-native products (20, 23, 24) has  
74 also been demonstrated. In our previous study, we engineered ADP1 for the production of 1-  
75 alkenes from ferulate (23), which represents one of the major compounds of alkaline-pretreated  
76 lignin (25–27). Engineering aromatic compound catabolism to valorize the lignin fraction of  
77 lignocellulose has important industrial potential (28, 29), and ADP1 is among the best bacterial  
78 candidates for this purpose (26). However, due to the inhibitory effects of lignin-derived aromatic  
79 compounds and the complexity of the associated pathways, natural pathways are not yet optimal  
80 for lignin valorization.

81 In this study, ALE was used to increase the tolerance and utilization of aromatic compounds to  
82 improve the suitability of ADP1 for these biotechnology applications. Catabolic pathways for

83 aromatic compound degradation via the  $\beta$ -ketoadipate pathway in ADP1 and other bacteria have  
84 been well characterized (30–32). ALE has been shown to be effective in overcoming problematic  
85 aspects of complex regulation, transport, and enzyme specificity for aromatic compound  
86 degradation (17, 33). As described in this report, we characterized the phenotypes of different ALE  
87 lineages followed by whole-genome sequencing. Our new method, Rapid Advantageous Mutation  
88 ScrEening and Selection (RAMSES), facilitated the identification of the relevant mutations and  
89 the reverse engineering process. Finally, strains with increased tolerance were reconstructed by  
90 the new method and characterized. This study provides insights into enhancing the tolerance of  
91 production hosts towards lignin-derived aromatics and highlights the utility of ADP1.

## 92 **2. Results**

### 93 **2.1. Adaptive laboratory evolution of *A. baylyi* ADP1 for high ferulate tolerance**

94 Two parallel evolutions were previously carried out for ADP1 to improve the growth on ferulate  
95 as a sole carbon source (23), designated as G1 and G2 evolution lines here (Figure S1). Here, we  
96 carried out the ALE experiment also for two additional lineages to improve the tolerance towards  
97 ferulate, where 0.2% (w/v) casamino acids and 10 mM acetate were supplied along with ferulate,  
98 designated as T1 and T2 evolution lines (Figure S1). Acetate was added as an additional carbon  
99 source, as acetate is present in substantial amounts in the commonly used lignin-enriched stream  
100 (25, 26). This approach allows finding mutations that are potentially advantageous for both  
101 tolerance and utilization of aromatic compounds. To develop highly ferulate-tolerant strains,  
102 ferulate concentration was increased step-wise during the evolution experiments. A starting  
103 concentration of 55 mM was applied to the T1 and T2 evolution lines. The cells were daily  
104 passaged to fresh media for two months (360-375 generations), with the endpoint ferulate

105 concentration being 135 mM for the T1/T2 evolution line. Individual isolates were obtained from  
106 end-point populations. Four isolates, which were named using ASA strain designations, were used  
107 for the subsequent studies (Figure S1): ASA500 and ASA501 were from G1 and G2 evolution  
108 lines respectively, and ASA502 and ASA503, were both from the T2 evolution line.

## 109 **2.2. Characterization of the evolved strains**

110 The evolved strains ASA500, ASA501, ASA502, and ASA503 were cultivated at different ferulate  
111 concentrations in 96-well plates, and wild-type ADP1, designated as WT ADP1, was used as the  
112 control. It was noted that a biphasic growth pattern was observed in some cases when cells were  
113 grown on the aromatic substrates (Figure S2). Therefore, to evaluate the tolerance of strains  
114 consistently and comprehensively at different conditions, we decided to use the time needed for  
115 cells to reach OD 0.8 as an indicator (later  $t_{OD\ 0.8}$ ). This indicator is influenced by both lag phase  
116 and growth rate.

117 All the evolved strains exhibited improved tolerance to ferulate, ASA500 had the best  $t_{OD\ 0.8}$  value  
118 (ASA500 and ASA501 Figure 1B, ASA502 and ASA503 Figure S3). In the presence of 20 mM  
119 ferulate, the  $t_{OD\ 0.8}$  was 42.5 h for WT ADP1, 12 h for ASA500, and 16 h for ASA501 (Figure 1B).  
120 For WT ADP1, a long lag phase accounted for most of  $t_{OD\ 0.8}$ . When ferulate concentration was  
121 increased to 80 mM, the growth of WT ADP1 was completely inhibited while the  $t_{OD\ 0.8}$  value was  
122 prolonged to 17 h for ASA500, and 33.5 h for ASA501 (Figure 1B). A similar experimental set-  
123 up was employed to test the growth of ASA500 and ASA501 on *p*-coumarate and vanillate. *p*-  
124 coumarate, ferulate, and vanillate are all catabolized through the protocatechuate branch of the  $\beta$ -  
125 ketoacid pathway. Vanillate is also an intermediate metabolite in the catabolism of ferulate (34)  
126 (Figure 1A). Improved tolerance towards *p*-coumarate and vanillate was also observed from the

127 two isolates ASA500 and ASA501 (Figure 1B). Vanillate seemed to be less toxic than ferulate and  
128 *p*-coumarate, as indicated by the growth of WT ADP1 on this substrate.

129 Although ASA502 and ASA503 evolved in the presence of 0.2% casamino acids and 10 mM  
130 acetate, both showed improved growth in ferulate as the sole carbon source (Figure S3). The two  
131 strains were further cultivated in elevated ferulate concentrations while being supplemented with  
132 casamino acids and acetate. When the ferulate concentration was increased from 40 mM to 80 mM,  
133 there was a 5 h of increase in the  $t_{OD\ 0.8}$  for both strains (Figure S4), which was shorter than the  
134 greater than 10 h increase observed when ferulate was the sole carbon source (Figure S3). In 40  
135 mM ferulate, WT ADP1 showed diauxic growth characteristic of the sequential consumption of  
136 carbon sources; the aromatic degradative pathway is known to be repressed in the presence of  
137 acetate through catabolite repression (31). Diauxic growth was not observed for ASA502 and  
138 ASA503. However, HPLC analysis showed that while acetate and ferulate were consumed  
139 sequentially when both substrates were present, the ferulate was rapidly consumed after acetate  
140 was depleted (data not shown). Interestingly, an increase of acetate concentration from 10 mM to  
141 50 mM improved the tolerance of WT ADP1 towards ferulate (Figure S4).

142 The tolerance towards aromatic acids may also be affected by the pH of media, possibly related to  
143 the protonation of the acids. Protonated aromatic acids can passively diffuse across bacterial cell  
144 membranes (35). The results in a Supplemental Note demonstrated an improved growth of WT  
145 ADP1 on ferulate in higher pH, which favors deprotonation of weak acids.

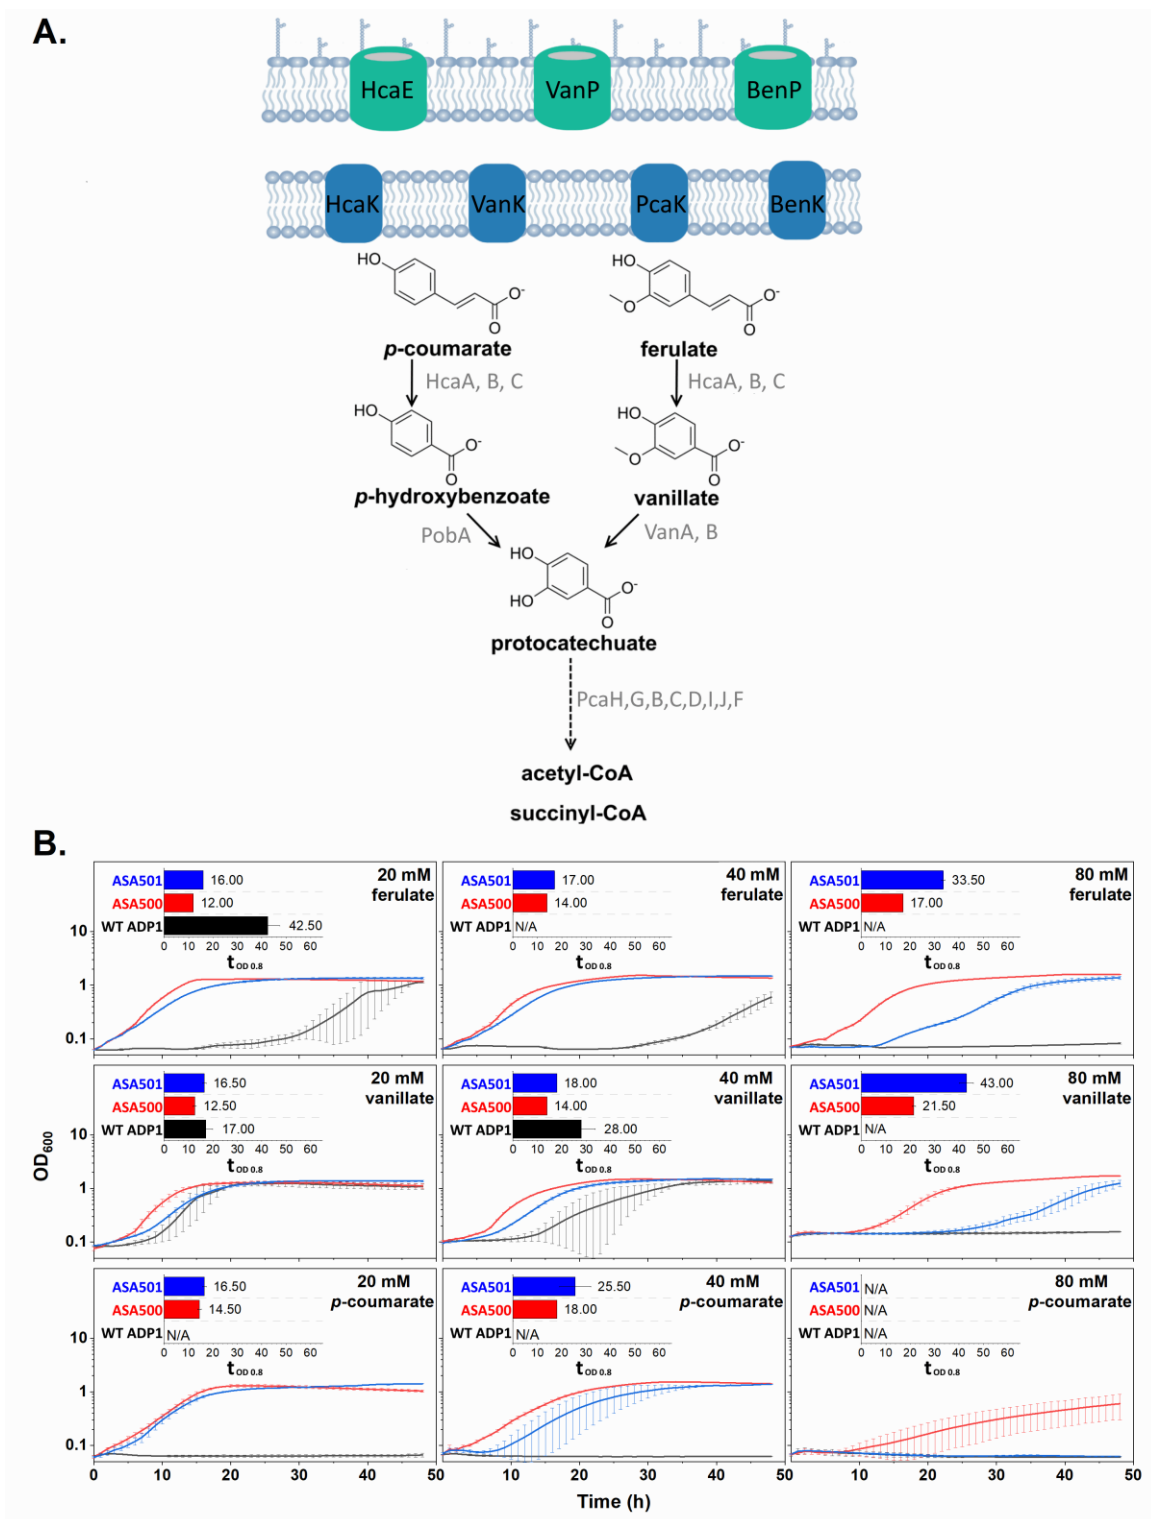

146

147 **Figure 1.** Growth of ASA500, ASA501, and WT ADP1 on ferulate, vanillate, and *p*-coumarate.

148 (A) Possible transport system (porins colored in green and transporters colored in blue) for



149 aromatic acids and the  $\beta$ -ketoadipate pathway in ADP1. The pathway indicated by the dashed  
150 arrow involves multiple steps. (B) Growth of the strains ASA500, ASA501, and WT ADP1 at  
151 different concentrations of ferulate, vanillate, and *p*-coumarate. All the strains were cultivated in  
152 mineral salts media with the corresponding aromatic compound as the sole carbon source. The  
153 time needed for the cells to reach the OD of 0.8 was used as the indicator to evaluate the tolerance  
154 ( $t_{OD\ 0.8}$ ). The indicator is calculated only when both replicates reached OD 0.8 within 48 h. All the  
155 values were calculated from two replicates and the error bars indicate the standard deviations. The  
156 y-axis is shown in log<sub>10</sub> scale.

### 157 **2.3. Genome sequencing of the evolved strains**

158 Whole genome sequencing was performed to discover the mutations in the evolved isolates. The  
159 sequencing reads from the five sequenced strains (ASA500, ASA501, ASA502, ASA503, and WT  
160 ADP1) were mapped to the reference genome of *A. baylyi* ADP1 (GenBank: CR543861). As some  
161 sequence variants that differ from the reference genome are present in the parent strain WT ADP1  
162 (Table S3), these variants were subtracted from the mutation pool of the evolved isolates. All the  
163 mutations in the evolved isolates are summarized in Table 1. The number of mutations in coding  
164 and non-coding regions for each strain is summarized in Figure 2. As ASA502 and ASA503 were  
165 isolated from the same population, they shared several mutations. For all the evolved strains, many  
166 of the mutations were found in the genes whose products are membrane proteins or involved in  
167 cell envelope modification. Notably, some of these genes are associated with aromatic transport,  
168 including *hcaE*, *vanK*, and *hcaK* (34, 36, 37). The gene *hcaE* encodes an outer membrane porin,  
169 and both *vanK* and *hcaK* encode transport proteins belonging to the major facilitator superfamily.  
170 The gene *hcaE* was mutated in all the four strains: insertion of the IS (insertion sequence) element,  
171 *IS1236*, for ASA500 and ASA501, and a single nucleotide insertion for ASA502 and ASA503.

172 An 1137 bp deletion extending from the position 732 bp upstream of *vanK* to its CDS position 405  
173 was identified in ASA500, and a 5 bp deletion in *hcaK* was identified in ASA501. All the mutations  
174 in the three genes would likely result in loss of protein function.

175 We analyzed the emergence of the IS insertion in *hcaE* and the 1137 bp deletion in *vanK* by PCR-  
176 amplification of the target regions from the genomes of samples from the evolving populations  
177 taken at different times during the experiments. It was found that the *hcaE* mutation had already  
178 emerged on day 3 ( $\approx 11$  generations, ferulate concentration = 45 mM) for both G1 and G2 evolution  
179 lines (Figure 3A). Considering that the *hcaE* mutations in the two independently evolved strains,  
180 ASA500 and ASA501, are identical, the *hcaE* mutations were probably from the same origin and  
181 had already occurred in the pre-culture stage where 45 mM ferulate was applied (Figure S1). The  
182 deletion in the *vanK* region had already occurred in the G1 evolution line on day 20 ( $\approx 119$   
183 generations, ferulate concentration = 80 mM) and had been fixed between day 40 ( $\approx 236$   
184 generations, ferulate concentration = 115 mM) and day 50 ( $\approx 299$  generations, ferulate  
185 concentration = 120 mM) (Figure 3B).

186 Other mutations that were likely to cause loss of function were found in the genes *ACIAD2265*,  
187 *iscR*, *gacA*, and *ACIAD0602* (Table 1). *ACIAD2265*, which was mutated in ASA501, is predicted  
188 to encode a lytic transglycosylase involved in cell wall organization. The other genes, *iscR*, *gacA*,  
189 and *ACIAD0602*, were found to be mutated in ASA502 and ASA503. *iscR* potentially encodes a  
190 repressor of the *iscRSUA* operon, which is involved in the assembly of Fe-S clusters. Fe-S clusters  
191 are important in enzymes for aromatic compound degradation; for example, they act as co-factors  
192 of a two-component vanillate demethylase (VanAB) for the conversion of vanillate into  
193 protocatechuate (38). The gene *gacA* encodes a response regulator whose deletion has been  
194 characterized in *A. baumannii* and would lead to up/down-regulation of a large number of genes

195 (39). Interestingly, further analysis of the up/down-regulated genes showed that some genes are  
196 related to aromatic catabolism and uptake. *ACIAD0602* encodes a putative glycosyltransferase  
197 which shares >80% identity with GtrOC4 in *A. baumannii* by NCBI protein blast. GtrOC4 was  
198 proposed to be involved in the outer core synthesis of lipo-oligosaccharides (40).

199 Besides the aforementioned *IS1236* insertion in *hcaE* in ASA500 and ASA501, *IS1236* insertion  
200 was also identified in two non-coding regions in ASA502 and ASA503 (Table 1): one is 21 bp  
201 upstream of *ACIAD2867*, and another one is 135 bp upstream of *ACIAD0481*. Consistent with the  
202 previous report (41), all the *IS1236* insertions generated a small duplication, which resulted in 3  
203 bp repeats flanking the inserted IS element, as is known to occur for the mechanism of its  
204 transposition.

205 **Table 1.** Mutations in the evolved isolates.

| Gene locus ID (name) <sup>a</sup>    | Position <sup>a</sup>              | Description <sup>a</sup>                                                        | Mutation type               | DNA change                     | Protein effect   | ASA 500 | ASA 501 | ASA 502 | ASA 503 |
|--------------------------------------|------------------------------------|---------------------------------------------------------------------------------|-----------------------------|--------------------------------|------------------|---------|---------|---------|---------|
| <i>ACIAD1702</i> ( <i>pcaU</i> )     | 1708197                            | Regulatory protein for <i>pca</i> operon (activator)                            | Substitution (transition)   | G → A                          | P250L (CCA→CTA)  | +       | +       |         |         |
| <i>ACIAD1722</i> ( <i>hcaE</i> )     | 1730279-1730280                    | Porin                                                                           | Insertion (tandem repeat)   | (G)3 → (G)4                    | Frameshift       |         |         | +       | +       |
| <i>ACIAD1722</i> ( <i>hcaE</i> )     | 1730384-1730385                    | Porin                                                                           | Insertion (IS element)      | +IS, +AGG                      | Frameshift       | +       | +       |         |         |
| <i>ACIAD1727</i> ( <i>hcaK</i> )     | 1736544-1736548 or 1736548-1736552 | Transporter                                                                     | Deletion                    | -TGCTG or -GTGCT               | Frameshift*      |         | +       |         |         |
| <i>ACIAD0982</i> ( <i>vanK</i> )     | 967651-968787                      | Transporter                                                                     | Deletion (> 1kb)            | 1137 bp deletion               | Loss of function | +       |         |         |         |
| <i>ACIAD2867</i>                     | 2807553                            | Putative Na <sup>+</sup> /H <sup>+</sup> antiporter                             | Substitution (transition)   | G → A                          | A247V (GCA→GTA)  | +       |         |         |         |
| <i>ACIAD2265</i>                     | 2236575-2236576                    | Putative rare lipoprotein A family                                              | Insertion                   | +C                             | Frameshift       |         | +       |         |         |
| <i>ACIAD2365</i> ( <i>msbA</i> )     | 2322575                            | Lipid transport protein                                                         | Substitution (transition)   | G → A                          | A486V (GCG→GTG)  |         |         | +       | +       |
| <i>ACIAD0648</i> ( <i>secA</i> )     | 639202                             | Preprotein translocase                                                          | Substitution (transition)   | C → T                          | P796L (CCA→CTA)  |         |         | +       |         |
| <i>ACIAD0482</i>                     | 476258-476269 or 476264-476275     | putative glycosyltransferase                                                    | Deletion                    | -TGAGGAAAGGCT or -AAGGCTTGAGGA | Δ166-169         | +       |         |         |         |
| <i>ACIAD0602</i>                     | 591935                             | Putative glycosyltransferase                                                    | Deletion (tandem repeat)    | (T)5 → (T)4                    | Frameshift       |         |         | +       | +       |
| <i>ACIAD1405</i> ( <i>iscR</i> )     | 1399615                            | Repressor of the <i>iscRSUA</i> operon                                          | Substitution (transition)   | G → A                          | Truncation       |         |         | +       | +       |
| <i>ACIAD0260</i> ( <i>gacA</i> )     | 261189                             | Response regulator                                                              | Deletion                    | -A                             | Frameshift       |         |         | +       | +       |
| <i>ACIAD3465</i>                     | 3392835                            | Putative two-component sensor                                                   | Substitution (transversion) | G → T                          | G881C (GGT→TGT)  |         | +       |         |         |
| <i>ACIAD2274</i> ( <i>sthA</i> )     | 2243241                            | Soluble pyridine nucleotide transhydrogenase                                    | Substitution (transition)   | G → A                          | A462V (GCT→GTT)  |         |         | +       | +       |
| <i>ACIAD0438</i> ( <i>rne</i> )      | 436298                             | Ribonuclease E                                                                  | Deletion                    | -A                             | Frameshift       |         | +       |         |         |
| <i>ACIAD3194</i> ( <i>rpoA</i> )     | 3122059                            | RNA polymerase alpha subunit                                                    | Substitution (transversion) | G → T                          | P291Q (CCA→CAA)  |         | +       |         |         |
| <i>ACIAD0308</i> ( <i>rpoC</i> )     | 307439                             | RNA polymerase beta subunit                                                     | Substitution (transition)   | A → G                          | D285G (GAT→GGT)  |         |         | +       |         |
| <i>ACIAD1220</i>                     | 1223930                            | Conserved hypothetical protein                                                  | Substitution (transversion) | C → G                          | G84A (GGA→GCA)   | +       |         |         |         |
| <i>ACIAD3457</i> to <i>ACIAD3481</i> | 3380313-3408297                    | N/A                                                                             | Duplication (IS involved)   | Duplication                    | N/A              | +       |         |         |         |
| <i>ACIAD3459</i> to <i>ACIAD3486</i> | 3380938-3413938                    | N/A                                                                             | Duplication (IS involved)   | Duplication                    | N/A              |         |         |         | +       |
| N/A                                  | 2808313-2808314                    | Non-coding region 21 bp upstream of <i>ACIAD2867</i>                            | Insertion (IS element)      | +IS, +AAC                      | N/A              |         |         | +       | +       |
| N/A                                  | 474157-474158                      | Non-coding region 135 bp upstream of <i>ACIAD0481</i>                           | Insertion (IS element)      | +IS, +TGT                      | N/A              |         |         | +       | +       |
| N/A                                  | 2766926-2766927                    | Non-coding region between <i>ACIAD2829</i> and <i>ACIAD2832</i>                 | Insertion (tandem repeat)   | (T)6 → (T)7                    | N/A              | +       |         | +       | +       |
| N/A                                  | 2236147                            | Non-coding region between <i>ACIAD2264</i> ( <i>mltB</i> ) and <i>ACIAD2265</i> | Deletion (tandem repeat)    | (T)7 → (T)6                    | N/A              |         |         | +       | +       |
| N/A                                  | 967592                             | Non-coding region 17 bp upstream of <i>ACIAD0980</i> ( <i>vanA</i> )            | Substitution (transition)   | C → T                          | N/A              |         |         |         | +       |

206 \* For HcaK, the UniProt entry Q7X0E0 (with 410 residues) was used as a reference to evaluate  
 207 the protein effect.

208 <sup>a</sup> Locus IDs, mutation positions, and descriptions were assigned according to the reference  
 209 genome CR543861 (GeneBank entry).

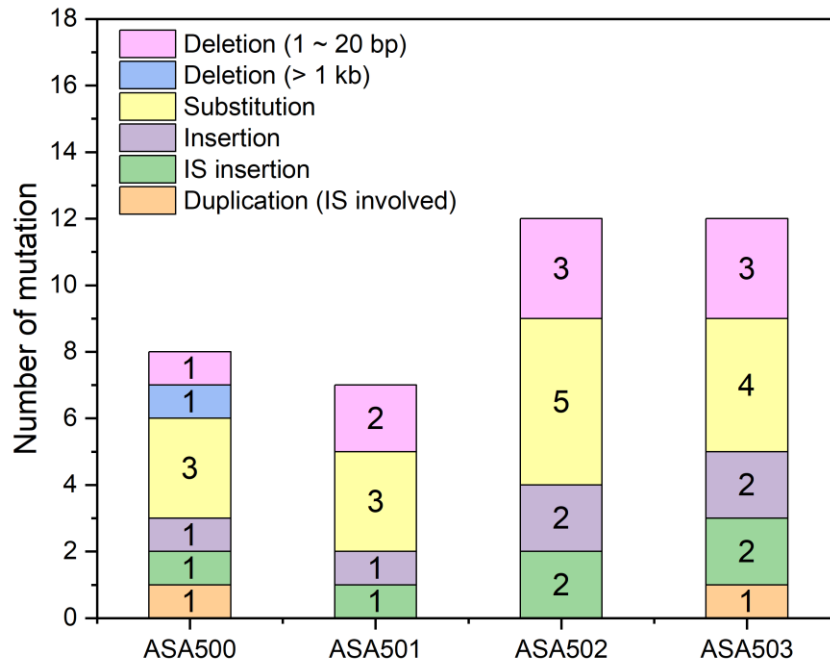

210

211 **Figure 2.** Number of mutations in the genomes of each evolved strain.

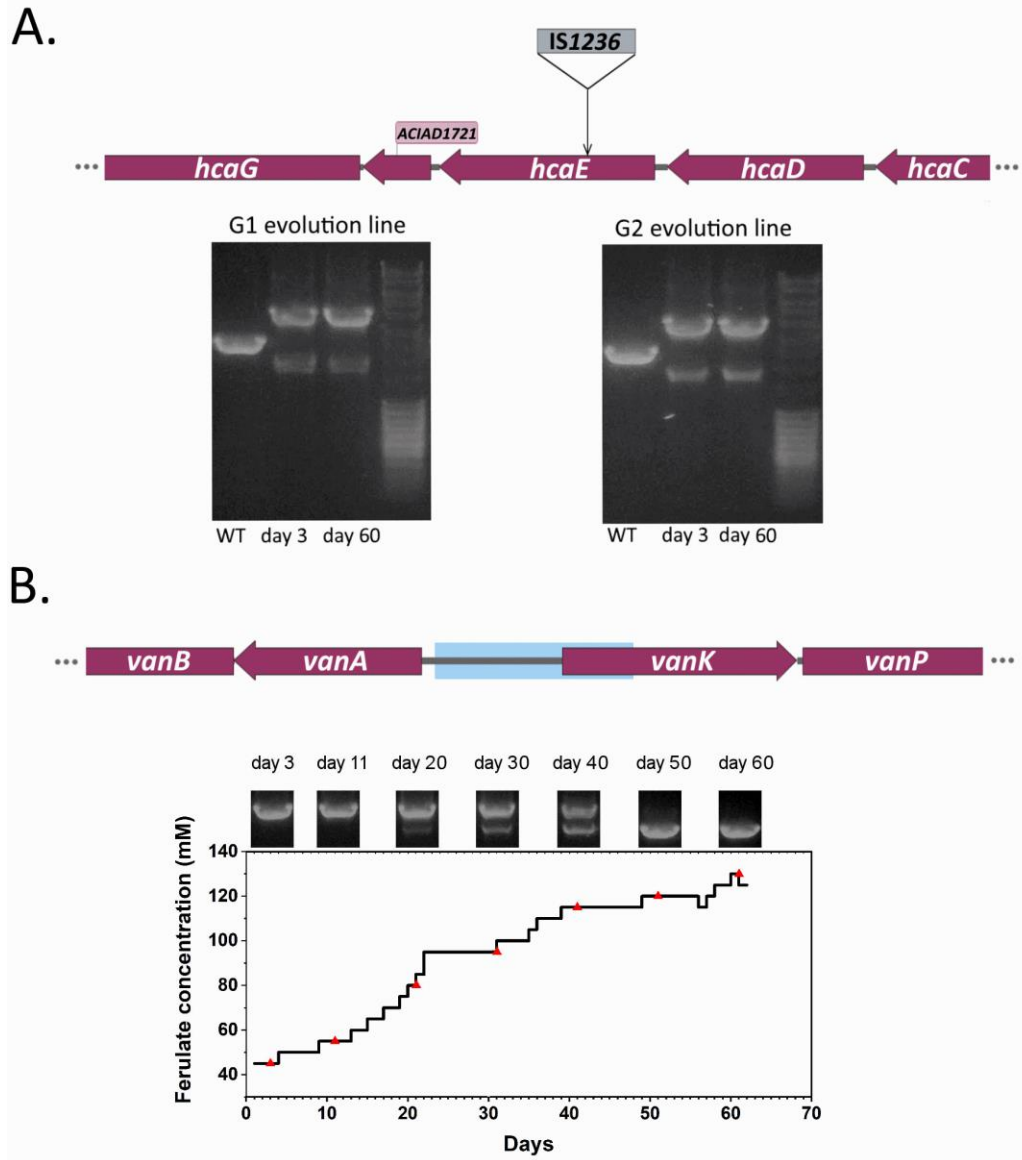

212

213 **Figure 3.** Temporal occurrence of the mutations in *hcaE* and *vanK* in G1 and G2 evolution  
214 populations. (A) The *hcaE* mutation caused by IS1236 insertion and gel electrophoresis showing  
215 the genotypic change in *hcaE* in G1 and G2 evolution populations sampled on different days. (B)  
216 Deletion in the *vanK* region and the genotypic change of this region in G1 evolution populations  
217 over time. The deletion of 1137 bp (highlighted in blue) extends from the upstream of *vanK* to its  
218 CDS position of nucleotide 405.

#### 219 **2.4. IS-involved gene duplication was identified in the evolved strains**

220 Gene duplication was found in the evolved strains ASA500 and ASA503, which was probably  
221 mediated by *IS1236*. Sequencing analysis showed that the strains ASA500 and ASA503 had DNA  
222 regions at similar genomic positions with sequencing coverages 2-fold higher than those of the  
223 genomes (Figure S5 and Table S4), suggesting a duplication event. The region in ASA500 had a  
224 size of approximately 28 kb covering the whole coding sequences of the genes from *ACIAD3457*  
225 to *ACIAD3481*, while the region in ASA503 had a size of about 33 kb extending from *ACIAD3459*  
226 to *ACIAD3486* (Table S4). Most of the involved genes were shared by the duplicated regions in  
227 ASA500 and ASA503. The sequence of *IS1236* was found at each junction of the region (Figure  
228 S6), suggesting that the duplicated region was flanked by *IS1236*. A potential explanation is that  
229 the region could be duplicated in the form of a composite transposon that might be inserted in one  
230 of the original *IS1236* sites. The duplications in the two strains were not identical, indicating that  
231 they resulted from independent events. However, the duplication was absent in ASA502, which  
232 was isolated from the same population as ASA503.

#### 233 **2.5 Rapid selection of advantageous mutations and reverse engineering**

234 To select and reverse-engineer the mutations that confer significantly improved tolerance towards  
235 ferulate, a novel approach (Rapid Advantageous Mutation ScrEening and Selection, RAMSES,  
236 Figure 4) was implemented. This method is based on ADP1's natural transformation, active  
237 homologous recombination machinery, and efficient enrichment of advantageous mutants under  
238 selective conditions. As illustrated in figure 4, the transformation is done by simply adding the  
239 amplified mutated alleles containing flanking regions of sequence identity to the chromosome to  
240 the cell culture (for liquid medium transformation) or the colony (for solid medium transformation).  
241 The cultures after transformation are then used to inoculate different selective media with

242 incremental selective pressures (here aromatic concentration). The use of a range of selective  
243 pressures enables finding a suitable condition for selection. The advantageous mutations are  
244 selected if the cells transformed with the corresponding alleles show significantly improved  
245 growth under the conditions used for growth.

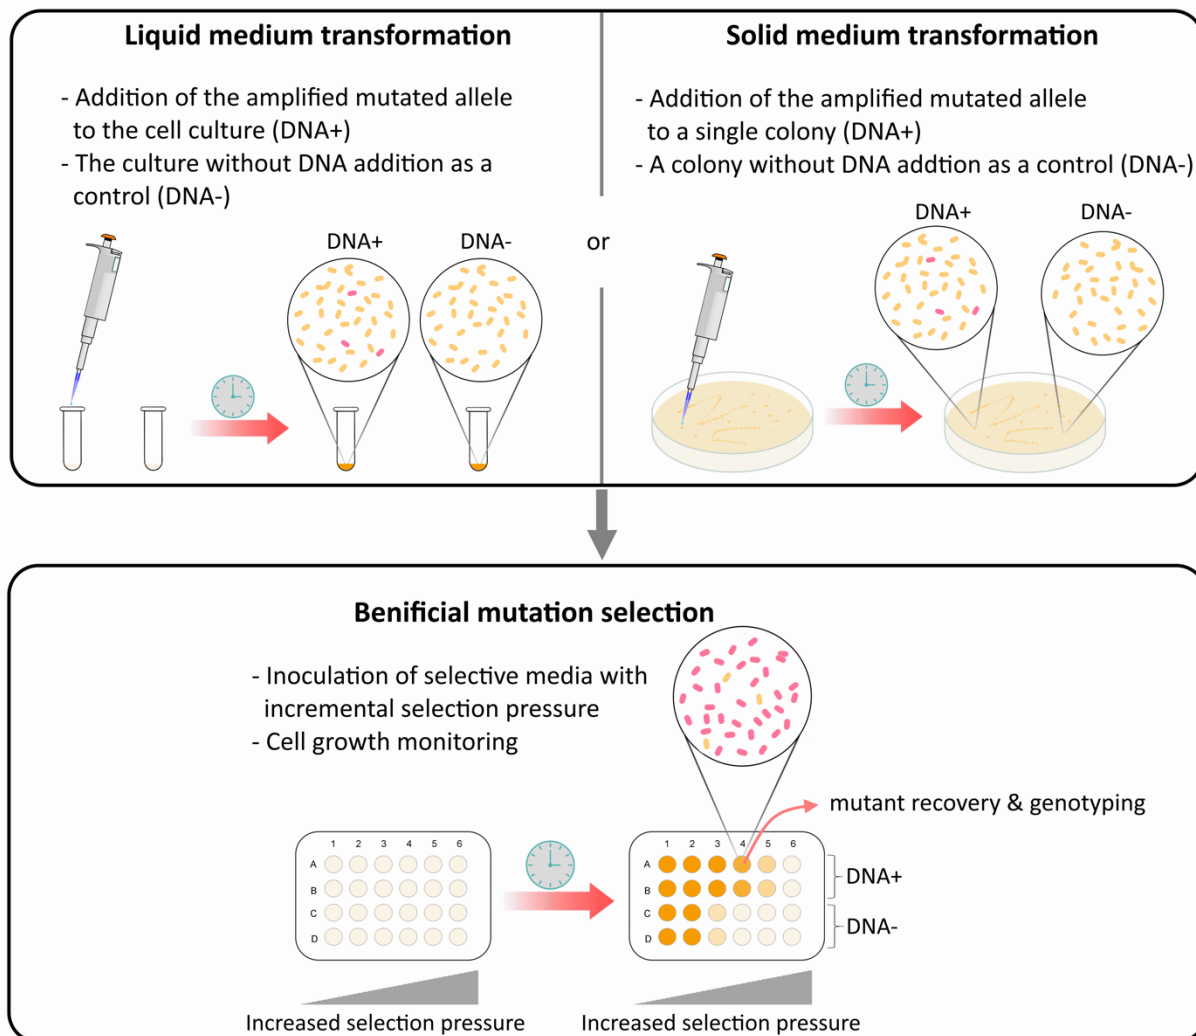

246

247 **Figure 4.** Schematic of RAMSES. The mutated allele amplified from the evolved strain is used to  
248 transform the background strain by direct addition of the purified PCR product to the exponentially  
249 growing cells (in small volume) or newly emerging colony. The linear DNA is incorporated into  
250 the chromosome by allelic replacement. The cultures after transformation are used to inoculate



251 different media with incremental selective pressures (here aromatic concentration) in a multi-well  
252 plate. The growth is monitored based on the measurement of optical density. The mutants (colored  
253 in red) containing the advantageous mutation can grow robustly and get enriched at the level of  
254 selective pressure such that it outcompetes the background strain, resulting in a different growth  
255 profile compared to the control. The mutant can be recovered from the culture by an additional  
256 enrichment step under the same (or higher) selective pressure and subsequent isolation, and the  
257 corresponding mutation(s) can be confirmed by sequencing (or PCR if possible).

258 RAMSES was performed with seven mutated alleles from the evolved isolates ASA500 and  
259 ASA501, including the *pcaU500* (P250L), *hcaE500* (frameshift by IS insertion), *vanK500* (loss of  
260 function by deletion), *hcaK501* (frameshift), *ACIAD2867\_500* (A247V), *ACIAD2265\_501*  
261 (frameshift), and *ACIAD0482\_500* ( $\Delta$ 166-169 in amino acid sequence). The transposon-free *A.*  
262 *baylyi* ADP1 (42), designated as ISx, was used as the background strain for the RAMSES. The  
263 strain, in which all the six copies of *IS1236* were deleted, has been shown to exhibit a more stable  
264 phenotype and increased transformability (42). The transformation was performed in liquid  
265 medium. The transformed cells were transferred to the selective media containing 20 mM, 40 mM,  
266 60 mM, and 80 mM ferulate. At 60 mM of ferulate, the cells transformed with *hcaE500* and  
267 *hcaK501* showed evident benefit, and their growth curves could be clearly distinguished from  
268 those of the controls (Figure 5), indicating the significance of the *hcaE* and *hcaK* mutations. The  
269 benefit from the mutation in *hcaE* is consistent with the observation that *hcaE* was mutated in all  
270 four evolved isolates. The other mutated alleles, such as the *pcaU500* and *ACIAD0482\_500*  
271 mutations, showed detectable but less prominent effects or large variances between replicates.

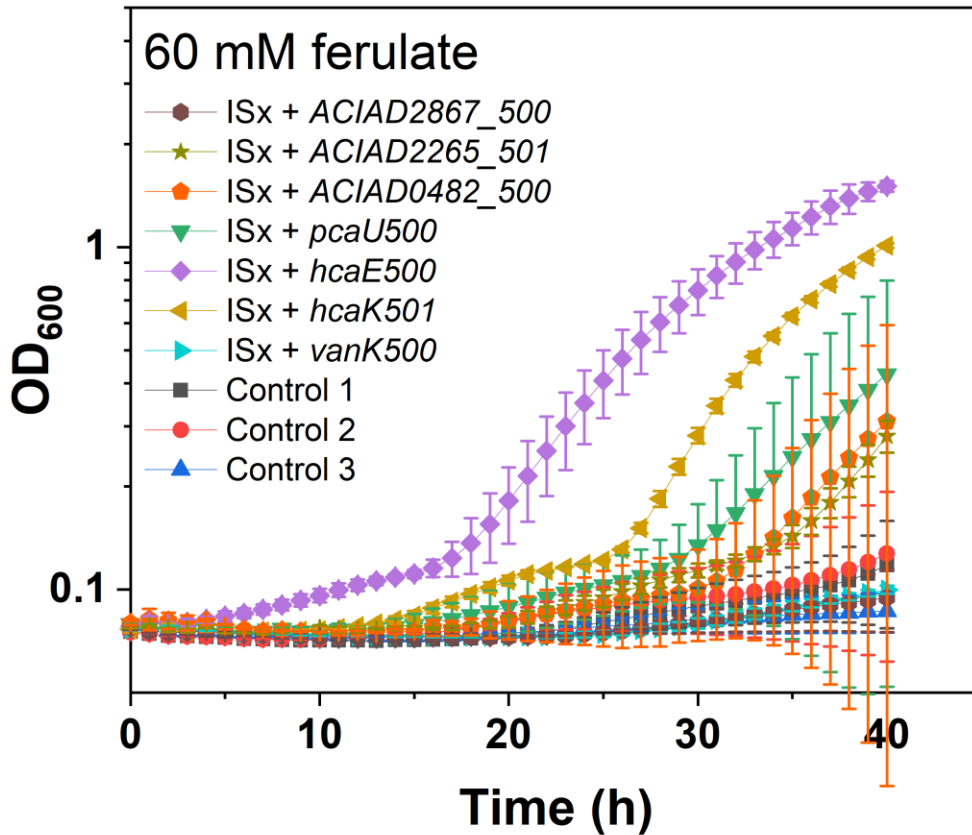

272

273 **Figure 5.** Initial screening of advantageous mutations by RAMSES. Growth of ISx in 60 mM  
274 ferulate after being transformed with the selected mutated alleles is shown. Control 1: ISx without  
275 any treatment. Control 2: ISx treated with water. Control 3: ISx treated with a non-mutated allele.  
276 The OD values were calculated from two replicates. The error bars indicate the standard deviations.  
277 The y-axis is shown in log<sub>10</sub> scale.

278 Although the mutation-transformed cells could be directly isolated from the initial screening  
279 experiment, we confirmed the reproducibility of the method by re-introducing the mutations to the  
280 ISx strain by solid medium transformation. As the *hcaE* mutation found in ASA500/ASA501  
281 occurred in the early stage of the G evolution lines (Figure 3A), it was chosen as the first mutation

282 to be introduced into ISx. ISx showed improved growth at the elevated ferulate concentration (20  
283 mM) after being transformed with *hcaE500* (Figure 6A). An additional round of cultivation under  
284 the selection condition was performed to further enrich the *hcaE* mutant. PCR analysis from the  
285 genome of the enriched population showed the existence of both wild-type and the mutated *hcaE*  
286 genotypes (Figure 6A), indicating the enrichment of the *hcaE* mutant. The pure strain containing  
287 the mutant *hcaE* was further isolated and designated as ASA504. The mutated allele *vanK500* was  
288 also chosen to transform ISx, given its propagation in the G1 evolution population over time  
289 (Figure 3B) and the role of the gene related to aromatic transport (36). However, only one of the  
290 two replicate populations that were transformed with *vanK500* showed improved growth and  
291 enrichment of the *vanK* mutant (Figure S7). The pure strain containing *vanK500* was further  
292 isolated and designated as ASA505.

293 We next used ASA504 (reconstructed mutant *hcaE*) as the parent strain for the introduction of  
294 other mutated alleles, including *vanK500*, *hcaK501*, *pcaU500*, and *ACIAD0482\_500*. The  
295 ASA504 populations transformed with *vanK500* and *pcaU500* respectively did not show  
296 significantly improved growth at the ferulate concentrations tested (20-80 mM) (data not shown).  
297 However, it was found that ASA504 had poor growth on vanillate, while ASA505 (reconstructed  
298 mutant *vanK*) had improved growth in the same condition (Figure S8). Therefore, we hypothesized  
299 that *vanK500* would restore the growth of ASA504 on vanillate. Next, we transformed ASA504  
300 with *vanK500* and used vanillate as the selective pressure for mutant enrichment. As expected, the  
301 population of ASA504 showed improved growth on vanillate after being provided with the  
302 *vanK500* (Figure 6B). PCR analysis of *vanK* from the genomic DNA extracted from the enriched  
303 population showed only the band of *vanK500* (Figure 6B), indicating the predominance of this  
304 allele. A streak-purified isolate was designated as ASA506. Transforming ASA504 with *hcaK501*

305 and *ACIAD0482\_500* led to improved growth at 60 mM of ferulate (Figure 6C). After further  
 306 enrichment with the same selective pressure, pure isolates were obtained from each of the  
 307 populations. Six isolates from the *hcaK501* transformed-population and five isolates from the  
 308 *ACIAD0482\_500* transformed-population were analyzed by Sanger sequencing for *hcaK* and  
 309 *ACIAD0482* respectively. All these isolates were shown to contain the corresponding mutated  
 310 alleles (Figure 6C). The mutation in *hcaK501* would result in a frameshift (based on the HcaK  
 311 sequence from UniProt entry Q7X0E0) and likely caused loss of protein function, while the  
 312 mutation in *ACIAD0482\_500* would lead to deletion of 4 amino acids. The resulting mutants are  
 313 designated as ASA507 and ASA508 respectively. All the reconstructed strains were summarized  
 314 in Figure 6D.

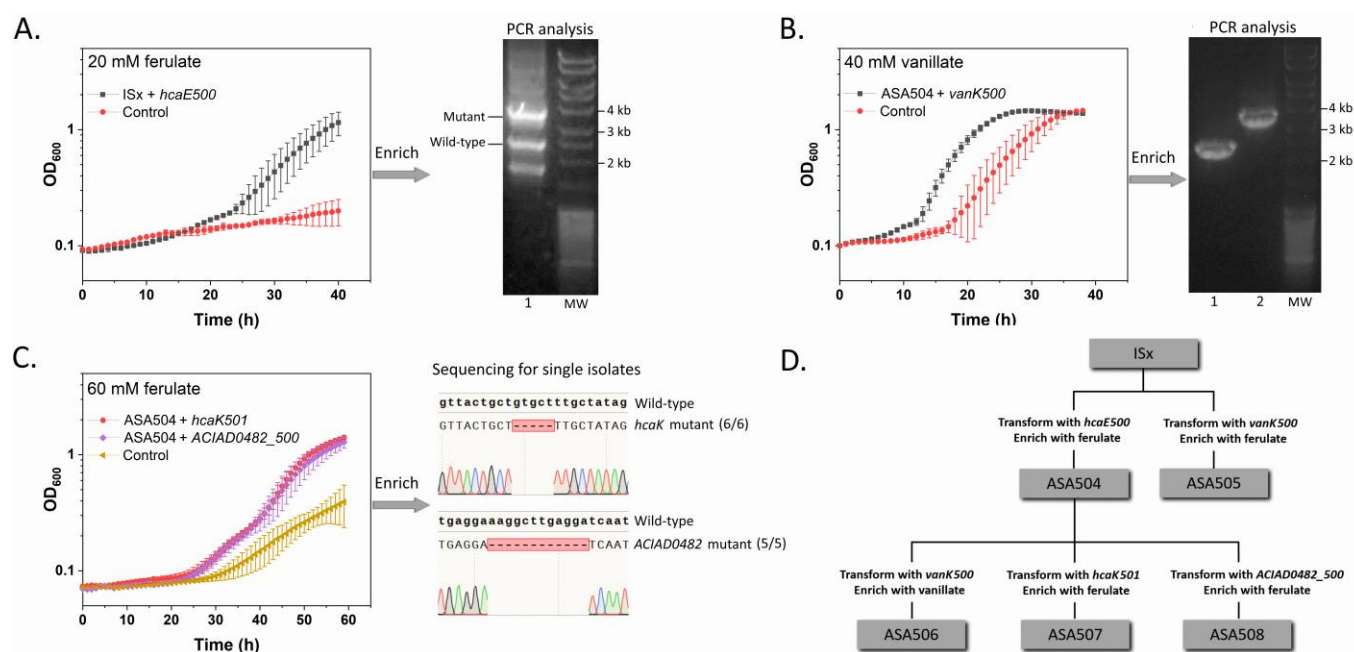

315  
 316 **Figure 6.** Reverse engineering of the selected mutations by RAMSES. (A) Reverse engineering  
 317 of *hcaE500* into ISx. Growth of ISx in 20 mM ferulate after transformation is shown. Control: ISx  
 318 without transformation. To analyze *hcaE*, PCR analysis was performed from the genome of the  
 319 transformed population after further enrichment. Lane 1: the transformed population. (B) Reverse

320 engineering of *vanK500* into ASA504 (reconstructed mutant *hcaE*). Growth of ASA504 in 40 mM  
321 vanillate after transformation is shown. Control: ASA504 without transformation. To analyze  
322 *vanK*, PCR analysis was performed from the genome of the transformed population after further  
323 enrichment. Lane 1: the transformed population. Lane 2: ASA504 containing wild-type *vanK*. (C)  
324 Reverse engineering of *hcaK501* and *ACIAD0482\_500* into ASA504 (reconstructed mutant *hcaE*).  
325 Growth of ASA504 in 60 mM ferulate after transformation is shown. Control: ASA504 without  
326 transformation. The genes *hcaK* and *ACIAD0482* of the single isolates from the enriched  
327 populations were analyzed by sequencing. Pure mutant strains were recovered by further isolation.  
328 (D) The reconstructed strains derived from ISx. The OD values were calculated from two replicates.  
329 The error bars indicate the standard deviations. The y-axis is shown in log<sub>10</sub> scale.

## 330 **2.6. Characterization of the reconstructed strains**

331 To compare the growth on ferulate between the reconstructed strains, they were cultivated at  
332 different ferulate concentrations. WT ADP1, ISx, ASA500 (evolved isolate), and ASA501  
333 (evolved isolate) were also cultivated for comparison. Although WT ADP1 seems to differ from  
334 ISx only in the copy number of the *IS1236* element, it had a better growth than ISx at 20 mM  
335 ferulate (Figure 7). Compared to the reference strain ISx, the single mutants, ASA504  
336 (reconstructed mutant *hcaE*) and ASA505 (reconstructed mutant *vanK*), showed improved growth  
337 at 20 mM of ferulate (Figure 7). Both strains exhibited improved tolerance also towards *p*-  
338 coumarate (Figure S8). However, the growth of the two single mutants was strongly inhibited at  
339 40 mM ferulate. Introduction of *vanK500* only slightly improved the growth of ASA504, as  
340 indicated by the growth of ASA506 (reconstructed mutant *hcaE* and *vanK*) (Figure 7). This result  
341 was consistent with the previous failed attempt to enrich the *hcaE* and *vanK* double mutant using  
342 ferulate. However, the growth of ASA504 on vanillate was significantly improved by introducing

343 *vanK500* (Figure S8). The genes *vanK* and *vanP* may be under the control of the same promoter  
344 due to their proximity. The mutation in *vanK500* would likely cause loss of *vanK* promoter region,  
345 which may negatively affect the expression of the downstream gene *vanP*. It was further explored  
346 (see Supplemental Note) whether deletion of both *vanK* and *vanP*, or *vanP* alone had the same  
347 effect as the mutation in *vanK500* in terms of improving the tolerance of ASA504 to vanillate.  
348 Both the *hcaK* and the *ACIAD0482* mutations further improved the tolerance of ASA504 to  
349 ferulate, as indicated by the robust growth of ASA507 (reconstructed mutant *hcaE* and *hcaK*) and  
350 ASA508 (reconstructed mutant *hcaE* and *ACIAD0482*) at 40 mM (Figure 7). ASA507 had the best  
351 growth on ferulate among the reconstructed strains, as it was the only reconstructed strain that  
352 grew robustly at 60 mM ferulate. Although a direct comparison between the evolved strain  
353 ASA500/ASA501 and ASA507 is complicated by their derivations from different parent strains,  
354 it is clear that there is potential to further recapitulate the evolved tolerance patterns by introducing  
355 other mutations.

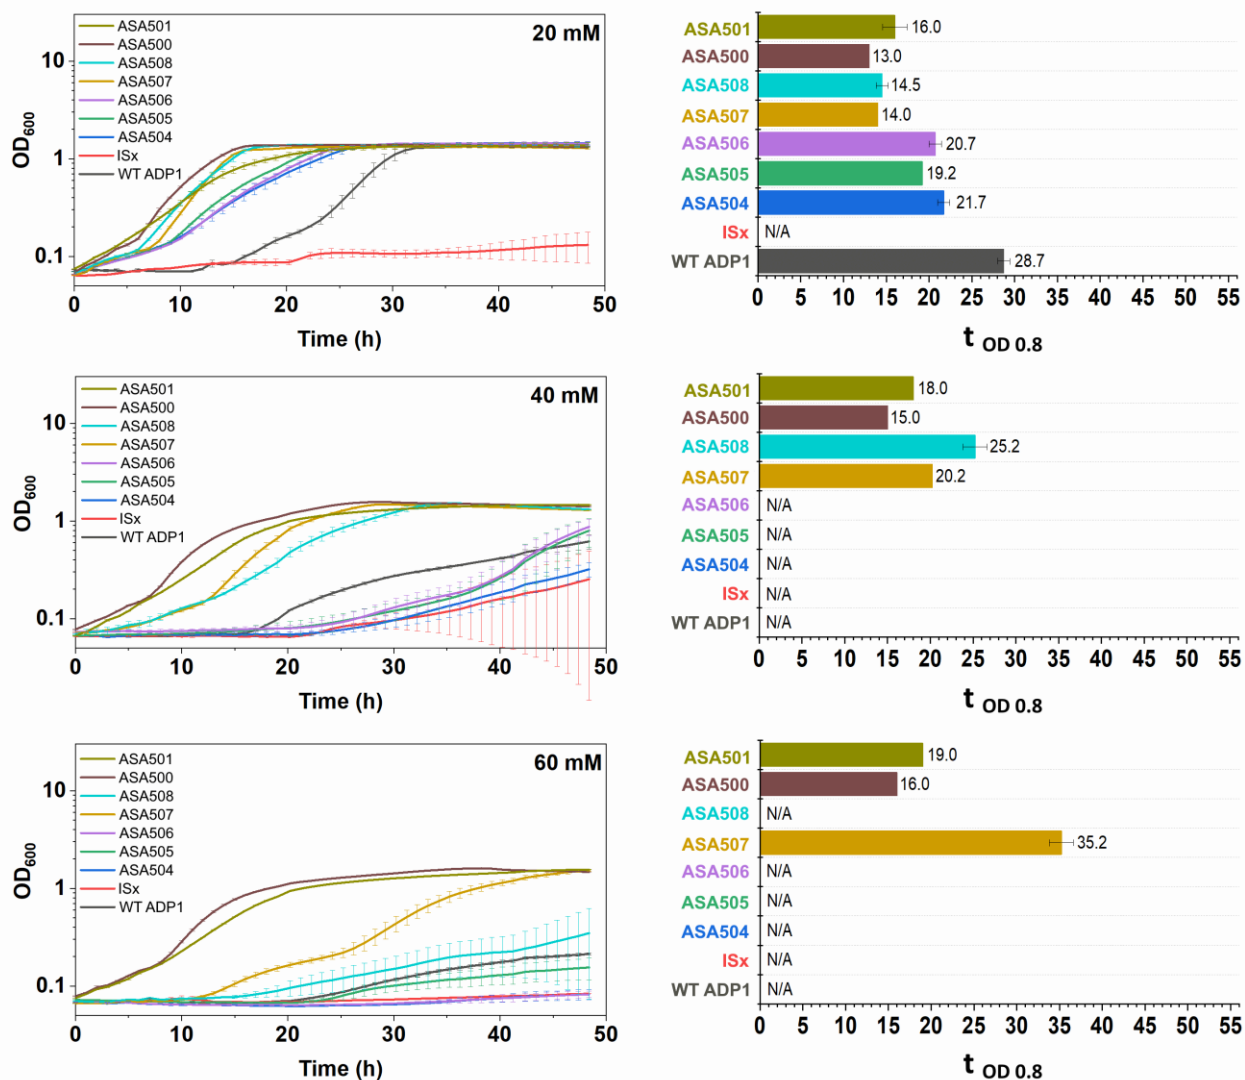

356

357 **Figure 7.** Growth comparison between the reconstructed strains at different ferulate concentrations  
 358 (20 mM, 40 mM, and 60 mM). ASA500 and ASA 501 are the evolved strains, and ASA504-508  
 359 are the reconstructed strains. All the strains were cultivated in mineral salts media with the ferulate  
 360 as the sole carbon source. The time needed for the cells to reach the OD of 0.8 was used as the  
 361 indicator to evaluate the tolerance ( $t_{OD\ 0.8}$ ). The indicator was calculated only when both replicates  
 362 reached OD 0.8 within 48 h. All the values were calculated from two replicates and the error bars  
 363 indicate the standard deviations. The y-axis is shown in log<sub>10</sub> scale.

### 364 **3. Discussion**

365 Lignocellulose biorefining has been demonstrated as a sustainable method for the production of  
366 fuels, chemicals, and materials (43). To date, the polysaccharide fraction of lignocellulose is of  
367 primary interest for the downstream conversion, whereas the lignin fraction is usually regarded as  
368 a waste, a low value-added product, or a source for process heat. Recent analysis has indicated that  
369 lignin valorization is essential to increase the sustainability and economic viability of  
370 lignocellulose-based industries (44, 45). The success of lignin valorization largely relies on lignin  
371 depolymerization and subsequent upgrading of the heterogeneous lignin-derived aromatics (44).  
372 However, due to the heterogeneity and impurity of lignin, it is a very challenging feedstock for  
373 chemical processes (29). The microbial valorization of lignin has been suggested (25, 27, 29); the  
374 aromatic catabolic pathways in some microbes allow the “funneling” of various aromatic species  
375 into two key aromatic ring-cleavage substrates, commonly protocatechuate and catechol, which  
376 can be further channeled to central carbon metabolism. Salvachúa *et al.* examined fourteen bacteria  
377 for their ability to utilize a lignin-enriched substrate (26); *A. baylyi* ADP1 was the best among the  
378 tested bacteria both to degrade high molecular weight lignin and consume low molecular weight  
379 lignin-derived compounds. The use of *A. baylyi* ADP1 as a host of engineering for biological lignin  
380 valorization is further warranted by its straightforward genome editing (14, 46) and the rapidly  
381 increasing number of available genetic tools (46).

382 Apart from the availability of lignin-derived aromatics for use as a substrate, their toxicity must  
383 be considered, which is regarded as a major challenge in the biological upgrading of lignin-  
384 enriched streams (47, 48). All the aromatic compounds tested in the current study showed varying  
385 degrees of toxicity when used as sole carbon sources: the growth of wild-type ADP1 on ferulate  
386 was significantly impaired when the concentration was increased from 20 mM to 40 mM.



387 Moreover, 80 mM was lethal to the cells, and cell growth was not observed in 20 mM *p*-coumarate  
388 (Figure 1B). In a previous study, a 33% reduction of growth rate was observed in glucose-grown  
389 *Pseudomonas putida* KT2440 and *Escherichia coli* MG1655 in the presence of 61 mM and 30 mM  
390 *p*-coumarate respectively (49). Consequently, the use of batch fermentation is greatly limited, and  
391 suitable fed-batch strategies need to be developed for substrate feeding without reaching toxicity  
392 limits. Some aromatics can cause severe growth impairment at much lower concentrations. For  
393 example, benzoate and catechol have been reported to completely inhibit glucose-grown *P. putida*  
394 KT2440 at 50 mM and 8 mM respectively (47, 50). In addition, prolonged contact with toxic  
395 aromatic compounds, even at low concentrations, may lead to other cellular malfunctions, such as  
396 cellular energy shortage, as demonstrated by Kohlstedt *et al.* (47). Biotransformation can become  
397 more challenging when the lignin-derived aromatics serve as the sole carbon sources, especially if  
398 the products of interest require high levels of carbon substrate to sustain the synthesis of desired  
399 products.

400 In our attempts to discover the tolerance mechanisms behind the evolved strains, aromatic-specific  
401 transport was found to play an important role. The loss-of-function mutations in the genes *hcaE*,  
402 *hcaK*, and *vanK* were identified to be advantageous by RAMSES. Reconstruction of the *hcaE*  
403 mutation improved the tolerance towards both ferulate and *p*-coumarate. This gene encodes an  
404 outer membrane porin, and it clusters with other genes responsible for ferulate and *p*-coumarate  
405 catabolism (34), implying that the porin may act on hydroxycinnamates. Interestingly, the *hcaE*  
406 mutation resulted in decreased tolerance towards vanillate. HcaE might have a low specificity for  
407 vanillate. The tolerance towards vanillate was improved by reconstruction of the *vanK* mutation.  
408 The gene *vanK* encodes a transporter belonging to the major facilitator superfamily. Its location  
409 near the *vanAB* operon, which is responsible for vanillate catabolism, implies that vanillate may

410 be transported by VanK, as proposed previously (51). VanK has been also reported to mediate the  
411 uptake of two other intermediates in the aromatic catabolic pathway, protocatechuate and *p*-  
412 hydroxybenzoate (36). The combination of the *hcaE* and *hcaK* mutations further improved the  
413 tolerance to ferulate. The gene *hcaK*, transcribed in the opposite direction of the *hca* operon by a  
414 bidirectional promoter (52), encodes a transporter which also belongs to the major facilitator  
415 superfamily. It is possible that ferulate and *p*-coumarate are both transported by HcaK. Loss of  
416 function mutations in these genes related to aromatic acid transport suggests a mechanism for  
417 tolerance/growth improvement by reducing the entry of aromatics. This is in line with a previous  
418 study in *P. putida* (9), which showed that deletion of an outer membrane porin PP\_3350 in a wild-  
419 type strain decreased the lag phase in 20 g/L *p*-coumarate (~123 mM) by >30 hours. In a recent  
420 study, Kusumawardhani *et al.* elucidated that several genes associated with porins and transport  
421 proteins were downregulated in an ALE-derived toluene-tolerant *P. putida* S12 (53). Besides the  
422 machinery associated with molecule uptake, efflux pumps have also been shown to contribute to  
423 the tolerance towards aromatic compounds (9, 49, 53). It is commonly known that aromatic  
424 compounds can disrupt cell membrane integrity due to their lipophilic (or partially lipophilic)  
425 nature (54, 55) and are also suggested to exert toxic effects intracellularly through different modes  
426 of actions (55, 56). Therefore, this mechanism of tolerance against aromatic compounds may result  
427 from their toxic effects in the periplasm or cytoplasm. In nature, the aromatic transport systems  
428 can be important for nutrient uptake, but in concentrations relevant to applications, their role  
429 becomes less important since aromatic acids in their protonated form can diffuse down the  
430 concentration gradient across cell membranes (35, 56). This may also explain our observation that  
431 wild-type ADP1 showed improved growth on ferulate at a higher pH, which can promote  
432 deprotonation and decrease the proportion of permeable aromatic acids.

433 The mutation in *ACIAD0482* was surprisingly found to be advantageous in ferulate tolerance. The  
434 product of *ACIAD0482* has not been reported in *A. baylyi* but has homology to LpsB of  
435 *Acinetobacter baumannii* with >80% identity. LpsB was reported to be a glycosyltransferase of  
436 the lipopolysaccharide (LPS) core (57). The 12 bp deletion in *ACIAD0482* would lead to the  
437 deletion of four amino acids from position 166 to 169 in the protein sequence. However, the effect  
438 of the deletion on the protein function is yet to be explored. Interestingly, another gene that is  
439 associated with lipooligosaccharide (LOS) was found to be mutated in ASA502 and ASA503: a  
440 single nucleotide deletion in *ACIAD0602*, which may lead to loss of protein function. *ACIAD0602*  
441 encodes a putative glycosyltransferase sharing >80% identity with GtrOC4 in *A. baumannii*, and  
442 GtrOC4 was proposed to be involved in the synthesis of the outer core of LOS (40). LPS/LOS is  
443 known to provide a barrier protecting gram-negative bacteria from hydrophobic substances (58,  
444 59), but the mechanism of the tolerance improvement by the glycosyltransferase mutation remains  
445 unclear.

446 The *IS1236* element played an important role in the mutation development of the evolution  
447 experiment presented here. In addition to its insertion in *hcaE* in ASA500/ASA501, *IS1236* was  
448 found to be inserted in two non-coding regions in the strain ASA502 and ASA503. Interestingly,  
449 the gene duplications observed in ASA500 and ASA503 were found to be related to *IS1236*; the  
450 duplicated region was flanked by *IS1236*, but the genomic context of the original copy of the  
451 region seemed not to change. We speculated that the duplication resulted from the formation of a  
452 new composite transposon by *IS1236* flanking the duplicated region, followed by integration of  
453 the composite transposon into one of the *IS1236* sites. Although the duplications in the two strains  
454 originated from independent evolution events, and most of the duplicated genes were shared by  
455 the two strains, the roles of the duplications are not obvious. Because the strain ASA502, which

456 was from the same population and shared many common mutations with ASA503, only showed a  
457 slight difference from ASA503 in the growth on ferulate but did not carry the duplication. *A. baylyi*  
458 ADP1 contains 6 copies of a single type of IS element, *IS1236*, five of which are identical (60). In  
459 a previous evolution study, it was reported that *IS1236* was responsible for 41% of mutations in  
460 ADP1 after propagation in rich nutrient broth for 1000 generations (61). Although IS elements  
461 may play a role in fitness improvement during evolution, they can also contribute to undesired  
462 genetic instability in engineered strains (42). This prompted us to use the transposon-free *A. baylyi*  
463 ADP1 (42), ISx, as the background strain for reverse engineering, though it seemed to have a  
464 decreased tolerance towards ferulate compared to wild-type ADP1.

465 From the point of view of rational engineering, it is desirable to find the “minimal set” of mutations  
466 resulting in significant improvement of a phenotype. Here, by employing the RAMSES  
467 methodology, we were rapidly able to identify and reintroduce two key mutations (the *hcaE* and  
468 *hcaK* mutations) that alone significantly improved the tolerance of *A. baylyi* ADP1 towards  
469 ferulate. Such a method would be particularly useful when screening a large number of mutations  
470 (and their combinations), in contrast to individual construction of knock-in cassettes. The high  
471 capability of screening would also make it possible to expand the subset of mutations to be tested  
472 beyond the mutations that are either intuitive or convergent between ALE replicates, increasing  
473 the potential to discover novel mechanisms behind the improved phenotypes. Here, for example,  
474 the *ACIAD0482* mutation, which may not be considered as beneficial intuitively, was found to be  
475 advantageous. In addition, the RAMSES approach can be easily automated with the use of a liquid  
476 handling robot, owing to the possibility of transforming *A. baylyi* directly in liquid culture.

## 477 **4. Conclusion**

478 We exploited the natural competence and high recombination efficiency of *A. baylyi* ADP1 in  
479 developing a simple and rapid method for screening, identifying, and reverse-engineering  
480 advantageous mutations that arose during ALE. The method was applied on strains that were  
481 evolved for high ferulate tolerance and then subjected to whole-genome sequencing. Among  
482 numerous mutations, we were able to determine that mutations in *hcaE* and *hcaK* played a major  
483 role in the improved tolerance. By simply introducing the combination of these two mutations in  
484 a parent strain, the high tolerance against ferulate could be restored. This study highlights the  
485 potential of applying the naturally competent *A. baylyi* ADP1 for evolution studies and strain  
486 development and facilitates the construction of more robust cell factories for aromatic substrate  
487 valorization.

## 488 **5. Materials and methods**

### 489 **2.1. Strains and media**

490 Wild-type *Acinetobacter baylyi* ADP1 (DSM 24193, DSMZ, Germany) was used as a starting  
491 strain for ALE, designated as WT ADP1. The transposon-free *A. baylyi* ADP1 (42) (a kind gift  
492 from Barrick lab), designated as ISx in this study, was used as the parent strain for reverse  
493 engineering. *E. coli* XL1-Blue (Stratagene, USA) was used as the host in cloning steps. All the  
494 strains used in this study are listed in Table S1.

495 Mineral salts medium (MSM) was used for ALE, growth study, and reverse engineering. The  
496 carbon sources, including ferulate, vanillate, *p*-coumarate, casamino acids, and acetate were added  
497 when appropriate. The composition of MSM was 3.88 g/l K<sub>2</sub>HPO<sub>4</sub>, 1.63 g/l NaH<sub>2</sub>PO<sub>4</sub>, 2.00 g/l  
498 (NH<sub>4</sub>)<sub>2</sub>SO<sub>4</sub>, 0.1 g/l MgCl<sub>2</sub>·6H<sub>2</sub>O, 10 mg/l Ethylenediaminetetraacetic acid (EDTA), 2 mg/l

499 ZnSO<sub>4</sub>·7H<sub>2</sub>O, 1 mg/l CaCl<sub>2</sub>·2H<sub>2</sub>O, 5 mg/l FeSO<sub>4</sub>·7H<sub>2</sub>O, 0.2 mg/l Na<sub>2</sub>MoO<sub>4</sub>·2H<sub>2</sub>O, 0.2 mg/l  
500 CuSO<sub>4</sub>·5H<sub>2</sub>O, 0.4 mg/l CoCl<sub>2</sub>·6H<sub>2</sub>O, 1 mg/l MnCl<sub>2</sub>·2H<sub>2</sub>O. The stock solutions of ferulate, vanillate,  
501 and coumarate were prepared with a concentration of 200 mM; briefly, the proper amount of  
502 aromatic acid (all purchased from Sigma, USA) was added in deionized water and dissolved by  
503 slowly adding NaOH while stirring. The final pH of the stock solutions was 8.2~8.3. The stock  
504 solutions were further sterilized by filtration with sterile filters (pore size 0.2 μm, Whatman). The  
505 stock solutions were freshly prepared before each experiment. *E. coli* strains were maintained on  
506 modified LB medium (10 g/L tryptone, 5 g/L yeast extract, 1 g/L NaCl) supplemented with 1%  
507 glucose. For solid medium, 15 g/L agar was added. Spectinomycin (50 μg/ml) was added when  
508 appropriate.

## 509 **2.2. Adaptive laboratory evolution of *Acinetobacter baylyi* ADP1**

510 Two parallel evolutions with ferulate as a sole carbon source, designated as G1 and G2 evolution  
511 lines here, have been described previously (23). Here, two additional parallel evolutions were  
512 carried out to improve the tolerance on ferulate, designated as T1 and T2 evolution lines, in which  
513 acetate and casamino acids were supplemented in addition to ferulate. The ALE cultivation was  
514 performed in Erlenmeyer flasks (100 ml) containing 10 ml medium at 30 °C and 300 rpm. Wild-  
515 type ADP1 was first plated on solid MSM, and 25 mM ferulate, 10 mM acetate, and 0.2% (W/V)  
516 casamino acids were supplemented. The single colony from the plate was pre-cultivated in MSM  
517 supplemented with 55 mM ferulate, 10 mM acetate, and 0.2% (W/V) casamino acids. The pre-  
518 culture was transferred to two Erlenmeyer flasks containing the same medium, resulting in the two  
519 parallel evolution populations. The cells were transferred to fresh media before reaching the  
520 stationary phase daily. The optical density at 600 nm (OD) was measured before each transfer. The  
521 amount of inoculum for each transfer was adjusted so that the initial OD after each transfer was

522 between 0.03 and 0.1. The cells were cryopreserved at  $-80\text{ }^{\circ}\text{C}$  every two transfers. The  
523 concentration of ferulate was gradually increased during the evolution. Individual isolates were  
524 streak purified twice on LB-agar plates from the end population of each evolution line.

525 The number of generations (n) per flask was calculated with the following equation:

526 
$$n = \log\left(\frac{N}{N_0}\right) / \log(2)$$
 ,

527 where N is the final OD<sub>600</sub> of the culture and N<sub>0</sub> is the initial OD<sub>600</sub>.

### 528 **2.3. Phenotype characterization**

529 The growth of different strains on different aromatic substrates was tested by cultivations in 96-  
530 well plates (Greiner Bio-One™ CellStar™ μClear™). The cells were pre-cultivated in MSM  
531 supplemented with 5 mM aromatic substrate (ferulate/vanillate/ *p*-coumarate) at which both the  
532 evolved strains and the reference strains can grow. After overnight cultivation, the cultures were  
533 inoculated (initial OD 0.05) into the media supplemented with the corresponding aromatic  
534 substrate at higher concentrations (as indicated in the result section). For strains from the evolution  
535 line T2, appropriate amounts of acetate and casamino acids were added when needed. The culture  
536 (200 μl) was transferred to the 96-well plate and incubated in Spark multimode microplate reader  
537 (Tecan, Switzerland) at 30 °C. Double orbital shaking was performed for 5 min twice an hour with  
538 an amplitude of 6 mm and a frequency of 54 rpm. OD was measured every hour. The cultivations  
539 were performed in duplicate. To study the effect of increased pH on cell growth, the pH of the  
540 media was adjusted by adding concentrated NaOH. The media was further sterilized by filtration.  
541 The cultivation was performed with the same procedure as mentioned above. For pre-cultivation,  
542 the media without pH adjustment was used.

#### 543 **2.4. Whole-genome sequencing of the evolved strains**

544 Approximately 1  $\mu\text{g}$  of genomic DNA from each strain was isolated using the Nucleospin gDNA  
545 cleanup kit (Macherey-Nigel), then fragmented by sonication to an average size of 300–500 bp.  
546 End repair, A-tailing, and adapter ligation reactions were performed on the fragmented DNA  
547 using the NEBNext Ultra II kit (New England Biolabs). Illumina paired-end sequencing was  
548 performed on a NextSeq500 device at the Georgia Genomics Facility (University of Georgia).  
549 The sequences were analyzed using both Geneious prime version 8.1 with default settings (62) and  
550 the Breseq (version 0.35.4) computational pipeline (63). Version 2.4.1 of bowtie2 and version  
551 4.0.0 of R were used in the pipeline. The consensus mode was used with the default consensus  
552 frequency cutoff of 0.8 and polymorphism frequency cutoff of 0.2. The raw reads from the five  
553 sequenced strains (ASA500, ASA501, ASA502, ASA503, and WT ADP1) were mapped to the  
554 reference genome of *A. baylyi* ADP1 (GenBank: CR543861).

#### 555 **2.5. Initial screening of advantageous mutations**

556 The mutated alleles were first PCR-amplified from the evolved strains with Phusion high-fidelity  
557 DNA polymerase (Thermo Scientific, Finland), using the primers listed in Table S2. The amplified  
558 DNA fragments contained at least 500 bp of homology on each side of the mutated region. The  
559 PCR products were then loaded onto the agarose gel for electrophoresis. To avoid cross-  
560 contamination between the PCR products of the different mutated alleles, it is important to leave  
561 one well empty between the samples and not to overload the PCR products. The amplified DNA  
562 was purified with GeneJET Gel Extraction Kit (Thermo Scientific) and eluted with pre-warmed  
563 water. The concentrations of the purified PCR products ranged from 30 ng/ $\mu\text{l}$  to 100 ng/ $\mu\text{l}$ . For  
564 natural transformation, ISx was first pre-cultivated in LB medium supplemented with 0.4%



565 glucose. When the cells were in early exponential phase, 20  $\mu$ l of the purified DNA was directly  
566 added to 180  $\mu$ l of the culture, and then the mixture was incubated in 14 ml cultivation tube at  
567 30 °C and 300 rpm for 3~4 hours. The cells treated with water, an unmutated allele (gene entry:  
568 *ACIAD3383*) amplified from the evolved strain, and without any treatment were used as the  
569 controls. To adapt the cells to the medium used for the downstream process, 5 ml of MSM  
570 supplemented with 5 mM ferulate was added to the tube, and the culture was incubated overnight.  
571 After the incubation, 10  $\mu$ l of the cells were transferred to different wells of a 96-well plate (Greiner  
572 Bio-One™ CellStar™  $\mu$ Clear™) containing 140  $\mu$ l of MSM with elevated ferulate concentrations  
573 (20 mM – 80 mM). The plate was incubated in Spark multimode microplate reader (Tecan,  
574 Switzerland) at 30 °C, and the OD was measured every hour.

## 575 **2.6. Reverse engineering of key mutations**

576 The selected mutated alleles were PCR-amplified from the evolved strains using the primers listed  
577 in Table S2, and gel-extracted. For transformation, the background strain, ISx, was first streaked  
578 on LB-agar, and the plate was incubated at 30 °C overnight. The purified DNA (0.5  $\mu$ l) was added  
579 onto single colonies and mixed well by pipetting up and down. After overnight incubation at 30 °C,  
580 the colony treated with the DNA was scraped and suspended in MSM supplemented 5 mM of the  
581 corresponding aromatic substrate (ferulate or vanillate). As the control, a colony without DNA  
582 treatment was subjected to the same process. The suspension was further incubated at 30 °C and  
583 300 rpm for 0.5-10 h. After incubation, the suspension was used to inoculate 200  $\mu$ l of MSM  
584 supplemented with elevated concentrations of the aromatic substrate (ferulate or vanillate) in  
585 different wells of the 96-well plate. The plate was incubated in Spark multimode microplate reader  
586 (Tecan, Switzerland) at 30 °C, and the OD was monitored every hour. If the cells treated with the  
587 mutated allele showed improved growth over the control at the elevated aromatic concentration, 5

588  $\mu$ l of the cells were taken from the well and used to inoculate 5 ml of MSM containing the same  
589 (or higher) concentration of the corresponding aromatic substrate for further mutant enrichment.  
590 The culture was further streaked on LB-agar. The clones carrying the mutated allele were identified  
591 by picking single colonies for PCR analysis or Sanger sequencing.

## 592 **2.7. Genetic engineering**

593 ASA509 was constructed by transforming ASA504 with a linear integration cassette containing  
594 the spectinomycin resistance gene flanked by the sequences homologous to the sequences  
595 surrounding the *vanKP* region. The cassette was constructed by overlap extension PCR with the  
596 left flanking sequence (amplified with primers P1-F and P2-R, Table S2), the spectinomycin  
597 resistance gene (amplified with primers spec-F and spec-R), and the right flanking sequence  
598 (amplified with primers P3-F and P4-R). The linear cassette was later cloned to a previously  
599 described plasmid (18), and the left flanking sequence was replaced with another flanking  
600 sequence amplified with primers P5-F and P6-R. The resulting plasmid (non-replicating plasmid  
601 in ADP1) was used to transform ASA504 to obtain ASA510.

## 602 **2.8. Analysis of substrate consumption**

603 The concentrations of ferulate, vanillate, and acetate were analyzed using Agilent Technology  
604 1100 Series HPLC (UV/VIS system) equipped with G1313A autosampler, G1322A degasser,  
605 G1311A pump, and G1315A DAD. Rezex RFQ-Fast Acid H+ (8%) (Phenomenex) was used as  
606 the column and placed at 80 °C. Sulfuric acid (0.005 N) was used as the eluent with a pumping  
607 rate of 0.8 ml/min.

608 **Data availability**

609 Next-generation sequencing data generated in this study are available in NCBI Sequence Read  
610 Archive (SRA) BioProject accession number: PRJNA761218.

611 **Acknowledgements**

612 Funding: The research work was supported by Academy of Finland (grants no. 310188, 334822),  
613 Novo Nordisk Foundation (grant no. NNF21OC0067758) and U.S. Department of Agriculture  
614 (grant no. 2018-67009-27926).

615 **Author contribution**

616 Author contribution: JL, SS, and VS designed the study. JL and EM carried out the research  
617 work. JL, EM, and SB analyzed the data. SS, EN, and VS supervised the study. All authors  
618 participated in writing the manuscript.

619 **References**

- 620 1. Dragosits M, Mattanovich D. 2013. Adaptive laboratory evolution – principles and applications  
621 for biotechnology. *Microb Cell Fact* 12:64.
- 622 2. Sandberg TE, Salazar MJ, Weng LL, Palsson BO, Feist AM. 2019. The emergence of adaptive  
623 laboratory evolution as an efficient tool for biological discovery and industrial biotechnology.  
624 *Metab Eng* 56:1–16.
- 625 3. Fletcher E, Feizi A, Bisschops MMM, Hallström BM, Khoomrung S, Siewers V, Nielsen J. 2017.  
626 Evolutionary engineering reveals divergent paths when yeast is adapted to different acidic  
627 environments. *Metab Eng* 39:19–28.
- 628 4. Kildegaard KR, Hallström BM, Blicher TH, Sonnenschein N, Jensen NB, Sherstyk S, Harrison SJ,

- 629 Maury J, Herrgård MJ, Juncker AS, Forster J, Nielsen J, Borodina I. 2014. Evolution reveals a  
630 glutathione-dependent mechanism of 3-hydroxypropionic acid tolerance. *Metab Eng* 26:57–66.
- 631 5. Mundhada H, Seoane JM, Schneider K, Koza A, Christensen HB, Klein T, Phaneuf P V., Herrgard M,  
632 Feist AM, Nielsen AT. 2017. Increased production of L-serine in *Escherichia coli* through Adaptive  
633 Laboratory Evolution. *Metab Eng* 39:141–150.
- 634 6. Almario MP, Reyes LH, Kao KC. 2013. Evolutionary engineering of *Saccharomyces cerevisiae* for  
635 enhanced tolerance to hydrolysates of lignocellulosic biomass. *Biotechnol Bioeng* 110:2616–  
636 2623.
- 637 7. Lim HG, Fong B, Alarcon G, Magurudeniya HD, Eng T, Szubin R, Olson CA, Palsson BO, Gladden  
638 JM, Simmons BA, Mukhopadhyay A, Singer SW, Feist AM. 2020. Generation of ionic liquid  
639 tolerant *Pseudomonas putida* KT2440 strains via adaptive laboratory evolution. *Green Chem*  
640 22:5677–5690.
- 641 8. Phaneuf P V., Yurkovich JT, Heckmann D, Wu M, Sandberg TE, King ZA, Tan J, Palsson BO, Feist  
642 AM. 2020. Causal mutations from adaptive laboratory evolution are outlined by multiple scales of  
643 genome annotations and condition-specificity. *BMC Genomics* 21:514.
- 644 9. Mohamed ET, Werner AZ, Salvachúa D, Singer CA, Szostkiewicz K, Rafael Jiménez-Díaz M, Eng T,  
645 Radi MS, Simmons BA, Mukhopadhyay A, Herrgård MJ, Singer SW, Beckham GT, Feist AM. 2020.  
646 Adaptive laboratory evolution of *Pseudomonas putida* KT2440 improves p-coumaric and ferulic  
647 acid catabolism and tolerance. *Metab Eng Commun* 11:e00143.
- 648 10. Lee D-H, Palsson BØ. 2010. Adaptive Evolution of *Escherichia coli* K-12 MG1655 during Growth on  
649 a Nonnative Carbon Source, l-1,2-Propanediol. *Appl Environ Microbiol* 76:4158–4168.
- 650 11. Atsumi S, Wu T, Machado IMP, Huang W, Chen P, Pellegrini M, Liao JC. 2010. Evolution, genomic

- 651 analysis, and reconstruction of isobutanol tolerance in *Escherichia coli*. *Mol Syst Biol* 6:449.
- 652 12. Neidle EL, Ornston LN. 1986. Cloning and expression of *Acinetobacter calcoaceticus* catechol 1,2-  
653 dioxygenase structural gene *catA* in *Escherichia coli*. *J Bacteriol* 168:815–820.
- 654 13. Santala S, Santala V. 2021. *Acinetobacter baylyi* ADP1—naturally competent for synthetic  
655 biology. *Essays Biochem*.
- 656 14. de Berardinis V, Vallenet D, Castelli V, Besnard M, Pinet A, Cruaud C, Samair S, Lechaplais C,  
657 Gyapay G, Richez C, Durot M, Kreimeyer A, Le Fèvre F, Schächter V, Pezo V, Döring V, Scarpelli C,  
658 Médigue C, Cohen GN, Marlière P, Salanoubat M, Weissenbach J. 2008. A complete collection of  
659 single-gene deletion mutants of *Acinetobacter baylyi* ADP1. *Mol Syst Biol* 4:174.
- 660 15. Santala V, Karp M, Santala S. 2016. Bioluminescence-based system for rapid detection of natural  
661 transformation. *FEMS Microbiol Lett* 363:fnw125.
- 662 16. Jiang X, Palazzotto E, Wybraniec E, Munro LJ, Zhang H, Kell DB, Weber T, Lee SY. 2020.  
663 Automating Cloning by Natural Transformation. *ACS Synth Biol* 9:3228–3235.
- 664 17. Tumen-Velasquez M, Johnson CW, Ahmed A, Dominick G, Fulk EM, Khanna P, Lee SA, Schmidt AL,  
665 Linger JG, Eiteman MA, Beckham GT, Neidle EL. 2018. Accelerating pathway evolution by  
666 increasing the gene dosage of chromosomal segments. *Proc Natl Acad Sci* 115:7105–7110.
- 667 18. Santala S, Efimova E, Kivinen V, Larjo A, Aho T, Karp M, Santala V. 2011. Improved Triacylglycerol  
668 Production in *Acinetobacter baylyi* ADP1 by Metabolic Engineering. *Microb Cell Fact* 10:36.
- 669 19. Lehtinen T, Efimova E, Santala S, Santala V. 2018. Improved fatty aldehyde and wax ester  
670 production by overexpression of fatty acyl-CoA reductases. *Microb Cell Fact* 17:19.
- 671 20. Salmela M, Lehtinen T, Efimova E, Santala S, Santala V. 2019. Alkane and wax ester production

- 672 from lignin related aromatic compounds. *Biotechnol Bioeng* bit.27005.
- 673 21. Luo J, Efimova E, Losoi P, Santala V, Santala S. 2020. Wax ester production in nitrogen-rich  
674 conditions by metabolically engineered *Acinetobacter baylyi* ADP1. *Metab Eng Commun*  
675 10:e00128.
- 676 22. Santala S, Santala V, Liu N, Stephanopoulos G. 2021. Partitioning metabolism between growth  
677 and product synthesis for coordinated production of wax esters in *Acinetobacter baylyi* ADP1.  
678 *Biotechnol Bioeng*.
- 679 23. Luo J, Lehtinen T, Efimova E, Santala V, Santala S. 2019. Synthetic metabolic pathway for the  
680 production of 1-alkenes from lignin-derived molecules. *Microb Cell Fact* 18:48.
- 681 24. Arvay E, Biggs BW, Guerrero L, Jiang V, Tyo K. 2021. Engineering *Acinetobacter baylyi* ADP1 for  
682 mevalonate production from lignin-derived aromatic compounds. *Metab Eng Commun*  
683 13:e00173.
- 684 25. Vardon DR, Franden MA, Johnson CW, Karp EM, Guarnieri MT, Linger JG, Salm MJ, Strathmann  
685 TJ, Beckham GT. 2015. Adipic acid production from lignin. *Energy Environ Sci* 8:617–628.
- 686 26. Salvachúa D, Karp EM, Nimlos CT, Vardon DR, Beckham GT. 2015. Towards lignin consolidated  
687 bioprocessing: simultaneous lignin depolymerization and product generation by bacteria. *Green*  
688 *Chem* 17:4951–4967.
- 689 27. Linger JG, Vardon DR, Guarnieri MT, Karp EM, Hunsinger GB, Franden MA, Johnson CW, Chupka  
690 G, Strathmann TJ, Pienkos PT, Beckham GT. 2014. Lignin valorization through integrated  
691 biological funneling and chemical catalysis. *Proc Natl Acad Sci*.
- 692 28. Abdelaziz OY, Brink DP, Prothmann J, Ravi K, Sun M, García-Hidalgo J, Sandahl M, Hulteberg CP,  
693 Turner C, Lidén G, Gorwa-Grauslund MF. 2016. Biological valorization of low molecular weight

- 694 lignin. *Biotechnol Adv* 34:1318–1346.
- 695 29. Beckham GT, Johnson CW, Karp EM, Salvachúa D, Vardon DR. 2016. Opportunities and challenges  
696 in biological lignin valorization. *Curr Opin Biotechnol* 42:40–53.
- 697 30. Harwood CS, Parales RE. 1996. The  $\beta$ -ketoacid pathway and the biology of self-identity. *Annu*  
698 *Rev Microbiol* 50:553–590.
- 699 31. Fischer R, Bleichrodt FS, Gerischer UC. 2008. Aromatic degradative pathways in *Acinetobacter*  
700 *baylyi* underlie carbon catabolite repression. *Microbiology* 154:3095–3103.
- 701 32. Seaton SC, Neidle EL. 2018. Chapter 10. Using Aerobic Pathways for Aromatic Compound  
702 Degradation to Engineer Lignin Metabolism, p. 252–289. *In* .
- 703 33. Pardo I, Jha RK, Bermel RE, Bratti F, Gaddis M, McIntyre E, Michener W, Neidle EL, Dale T,  
704 Beckham GT, Johnson CW. 2020. Gene amplification, laboratory evolution, and biosensor  
705 screening reveal MucK as a terephthalic acid transporter in *Acinetobacter baylyi* ADP1. *Metab*  
706 *Eng* 62:260–274.
- 707 34. Smith MA, Weaver VB, Young DM, Ornston LN. 2003. Genes for Chlorogenate and  
708 Hydroxycinnamate Catabolism (hca) Are Linked to Functionally Related Genes in the dca-pca-qui-  
709 pob-hca Chromosomal Cluster of *Acinetobacter* sp. Strain ADP1. *Appl Environ Microbiol* 69:524–  
710 532.
- 711 35. Nichols NN, Harwood CS. 1997. PcaK, a high-affinity permease for the aromatic compounds 4-  
712 hydroxybenzoate and protocatechuate from *Pseudomonas putida*. *J Bacteriol* 179:5056–5061.
- 713 36. D’Argenio DA, Segura A, Coco WM, Bünz P V., Ornston LN. 1999. The Physiological Contribution  
714 of *Acinetobacter* PcaK, a Transport System That Acts upon Protocatechuate, Can Be Masked by  
715 the Overlapping Specificity of VanK. *J Bacteriol* 181:3505–3515.

- 716 37. Parke D, Ornston LN. 2003. Hydroxycinnamate (hca) Catabolic Genes from *Acinetobacter* sp.  
717 Strain ADP1 Are Repressed by HcaR and Are Induced by Hydroxycinnamoyl-Coenzyme A  
718 Thioesters. *Appl Environ Microbiol* 69:5398–5409.
- 719 38. Morawski B, Segura A, Ornston LN. 2000. Substrate Range and Genetic Analysis of *Acinetobacter*  
720 *Vanillate* Demethylase. *J Bacteriol* 182:1383–1389.
- 721 39. Cerqueira GM, Kostoulias X, Khoo C, Aibinu I, Qu Y, Traven A, Peleg AY. 2014. A Global Virulence  
722 Regulator in *Acinetobacter baumannii* and Its Control of the Phenylacetic Acid Catabolic Pathway.  
723 *J Infect Dis* 210:46–55.
- 724 40. Kenyon JJ, Nigro SJ, Hall RM. 2014. Variation in the OC Locus of *Acinetobacter baumannii*  
725 Genomes Predicts Extensive Structural Diversity in the Lipooligosaccharide. *PLoS One* 9:e107833.
- 726 41. Gerischer U, D’Argenio DA, Ornston LN. 1996. IS 1236, a newly discovered member of the IS3  
727 family, exhibits varied patterns of insertion into the *Acinetobacter calcoaceticus* chromosome.  
728 *Microbiology* 142:1825–1831.
- 729 42. Suárez GA, Renda BA, Dasgupta A, Barrick JE. 2017. Reduced Mutation Rate and Increased  
730 Transformability of Transposon-Free *Acinetobacter baylyi* ADP1-ISx. *Appl Environ Microbiol* 83.
- 731 43. Ragauskas AJ. 2006. The Path Forward for Biofuels and Biomaterials. *Science* (80- ) 311:484–489.
- 732 44. Schutyser W, Renders T, Van den Bosch S, Koelewijn S-F, Beckham GT, Sels BF. 2018. Chemicals  
733 from lignin: an interplay of lignocellulose fractionation, depolymerisation, and upgrading. *Chem*  
734 *Soc Rev* 47:852–908.
- 735 45. Ragauskas AJ, Beckham GT, Bidy MJ, Chandra R, Chen F, Davis MF, Davison BH, Dixon RA, Gilna  
736 P, Keller M, Langan P, Naskar AK, Saddler JN, Tschaplinski TJ, Tuskan GA, Wyman CE. 2014. Lignin  
737 Valorization: Improving Lignin Processing in the Biorefinery. *Science* (80- ) 344:1246843–



- 738 1246843.
- 739 46. Biggs BW, Bedore SR, Arvey E, Huang S, Subramanian H, McIntyre EA, Duscent-Maitland C V.,  
740 Neidle EL, Tyo KEJ. 2020. Development of a genetic toolset for the highly engineerable and  
741 metabolically versatile *Acinetobacter baylyi* ADP1. *Nucleic Acids Res* 48:5169–5182.
- 742 47. Kohlstedt M, Starck S, Barton N, Stolzenberger J, Selzer M, Mehlmann K, Schneider R, Pleissner D,  
743 Rinkel J, Dickschat JS, Venus J, B.J.H. van Duuren J, Wittmann C. 2018. From lignin to nylon:  
744 Cascaded chemical and biochemical conversion using metabolically engineered *Pseudomonas*  
745 *putida*. *Metab Eng* 47:279–293.
- 746 48. Salvachúa D, Johnson CW, Singer CA, Rohrer H, Peterson DJ, Black BA, Knapp A, Beckham GT.  
747 2018. Bioprocess development for muconic acid production from aromatic compounds and  
748 lignin. *Green Chem* 20:5007–5019.
- 749 49. Calero P, Jensen SI, Bojanovič K, Lennen RM, Koza A, Nielsen AT. 2018. Genome-wide  
750 identification of tolerance mechanisms toward *p*-coumaric acid in *Pseudomonas putida*.  
751 *Biotechnol Bioeng* 115:762–774.
- 752 50. van Duuren JBJH, Wijte D, Karge B, Martins dos Santos VAP, Yang Y, Mars AE, Eggink G. 2012. pH-  
753 stat fed-batch process to enhance the production of *cis*, *cis*-muconate from benzoate by  
754 *Pseudomonas putida* KT2440-JD1. *Biotechnol Prog* 28:85–92.
- 755 51. Pernstich C, Senior L, Madnnes KA, Forsaith M, Curnow P. 2014. Expression, purification and  
756 reconstitution of the 4-hydroxybenzoate transporter PcaK from *Acinetobacter* sp. ADP1. *Protein*  
757 *Expr Purif* 101:68–75.
- 758 52. Kim Y, Joachimiak G, Bigelow L, Babnigg G, Joachimiak A. 2016. How Aromatic Compounds Block  
759 DNA Binding of HcaR Catabolite Regulator. *J Biol Chem* 291:13243–13256.

- 760 53. Kusumawardhani H, Furtwängler B, Blommestijn M, Kaltenytė A, van der Poel J, Kolk J, Hosseini  
761 R, de Winde JH. 2021. Adaptive Laboratory Evolution Restores Solvent Tolerance in Plasmid-  
762 Cured *Pseudomonas putida* S12: a Molecular Analysis. *Appl Environ Microbiol* 87:1–18.
- 763 54. Ramos JL, Duque E, Gallegos M-T, Godoy P, Ramos-González MI, Rojas A, Terán W, Segura A.  
764 2002. Mechanisms of Solvent Tolerance in Gram-Negative Bacteria. *Annu Rev Microbiol* 56:743–  
765 768.
- 766 55. Mills TY, Sandoval NR, Gill RT. 2009. Cellulosic hydrolysate toxicity and tolerance mechanisms in  
767 *Escherichia coli*. *Biotechnol Biofuels* 2:26.
- 768 56. Borges A, Ferreira C, Saavedra MJ, Simões M. 2013. Antibacterial Activity and Mode of Action of  
769 Ferulic and Gallic Acids Against Pathogenic Bacteria. *Microb Drug Resist* 19:256–265.
- 770 57. Luke NR, Sauberan SL, Russo TA, Beanan JM, Olson R, Loehfelm TW, Cox AD, St. Michael F,  
771 Vinogradov E V., Campagnari AA. 2010. Identification and Characterization of a  
772 Glycosyltransferase Involved in *Acinetobacter baumannii* Lipopolysaccharide Core Biosynthesis.  
773 *Infect Immun* 78:2017–2023.
- 774 58. Zhang G, Baidin V, Pahil KS, Moison E, Tomasek D, Ramadoss NS, Chatterjee AK, McNamara CW,  
775 Young TS, Schultz PG, Meredith TC, Kahne D. 2018. Cell-based screen for discovering  
776 lipopolysaccharide biogenesis inhibitors. *Proc Natl Acad Sci* 115:6834–6839.
- 777 59. May KL, Grabowicz M. 2018. The bacterial outer membrane is an evolving antibiotic barrier. *Proc*  
778 *Natl Acad Sci* 115:8852–8854.
- 779 60. Cuff LE, Elliott KT, Seaton SC, Ishaq MK, Laniohan NS, Karls AC, Neidle EL. 2012. Analysis of  
780 is1236-mediated gene amplification events in *acinetobacter baylyi* ADP1. *J Bacteriol*.
- 781 61. Renda BA, Dasgupta A, Leon D, Barrick JE. 2015. Genome instability mediates the loss of key

- 782 traits by *Acinetobacter baylyi* ADP1 during laboratory evolution. *J Bacteriol.*
- 783 62. Kearse M, Moir R, Wilson A, Stones-Havas S, Cheung M, Sturrock S, Buxton S, Cooper A,  
784 Markowitz S, Duran C, Thierer T, Ashton B, Meintjes P, Drummond A. 2012. Geneious Basic: An  
785 integrated and extendable desktop software platform for the organization and analysis of  
786 sequence data. *Bioinformatics.*
- 787 63. Deatherage DE, Barrick JE. 2014. Identification of Mutations in Laboratory-Evolved Microbes  
788 from Next-Generation Sequencing Data Using *breseq*, p. 165–188. *In* .
- 789
